# Supplementary material for: Universality of Dicke superradiance in arrays of quantum emitters
Source: PubMed Central journal article supplement (PMC9046277; doi:10.1038/s41467-022-29805-4), 2022-04-27
Supplement: 41467_2022_29805_MOESM2_ESM.pdf [file 41467_2022_29805_MOESM2_ESM.pdf]

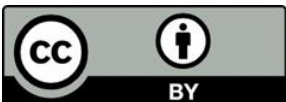

**Open Access** This file is licensed under a Creative Commons Attribution 4.0 International License, which permits use, sharing, adaptation, distribution and reproduction in any medium or format, as long as you give appropriate credit to the original author(s) and the source, provide a link to the Creative Commons license, and indicate if changes were made. In the cases where the authors are anonymous, such as is the case for the reports of anonymous peer reviewers, author attribution should be to 'Anonymous Referee' followed by a clear attribution to the source work. The images or other third party material in this file are included in the article's Creative Commons license, unless indicated otherwise in a credit line to the material. If material is not included in the article's Creative Commons license and your intended use is not permitted by statutory regulation or exceeds the permitted use, you will need to obtain permission directly from the copyright holder. To view a copy of this license, visit <http://creativecommons.org/licenses/by/4.0/>.

**Editorial Note:** This manuscript has been previously reviewed at another journal that is not operating a transparent peer review scheme. This document only contains reviewer comments and rebuttal letters for versions considered at *Nature Communications*.

## REVIEWERS' COMMENTS

Reviewer #1 (Remarks to the Author):

In my view, the authors have resolved all my remarks convincingly. Regarding my main criticism, it remains a fact that the analysis is (also) based on numerical analysis, but in their response and the revised manuscript the authors make a strong argument that this analysis is rather comprehensive and warrants their claims. Similarly, the other remarks were well resolved.

I do not agree with the second reviewer regarding his remark on the "generic phenomenon in line with previous work". Of course most researchers in the field would not object to the idea that superradiance is likely to occur as long as the medium is sufficiently dense. But I am not aware of a quantitative version of this expectation, in particular for ordered arrays. This is what the manuscript provides. I also do not agree to the summary that the analysis of the initial phase of the decay is less relevant since it omits the many interesting aspects throughout the long-time delay. Here, "interesting aspects" translate into "usually too difficult to treat analytically", and it is precisely the idea of the present work to circumvent these severe difficulties and still be able to make strong statements about the dynamics by focusing on the initial evolution.

In my view, the idea of making strong statements about the entire dynamics based on one instance in time is novel in this context and quite intriguing, and will likely spark considerable further research. Overall, I therefore recommend publication of the manuscript.
